# Supplementary material for: A Post-stroke Therapeutic Regimen with Omega-3 Polyunsaturated Fatty Acids that Promotes White Matter Integrity and Beneficial Microglial Responses after Cerebral Ischemia
Source: Springer Nature journal article supplement (doi:10.1007/s12975-016-0502-6), 2016-10-07
Supplement: MOESM1 [file 10831916]

**
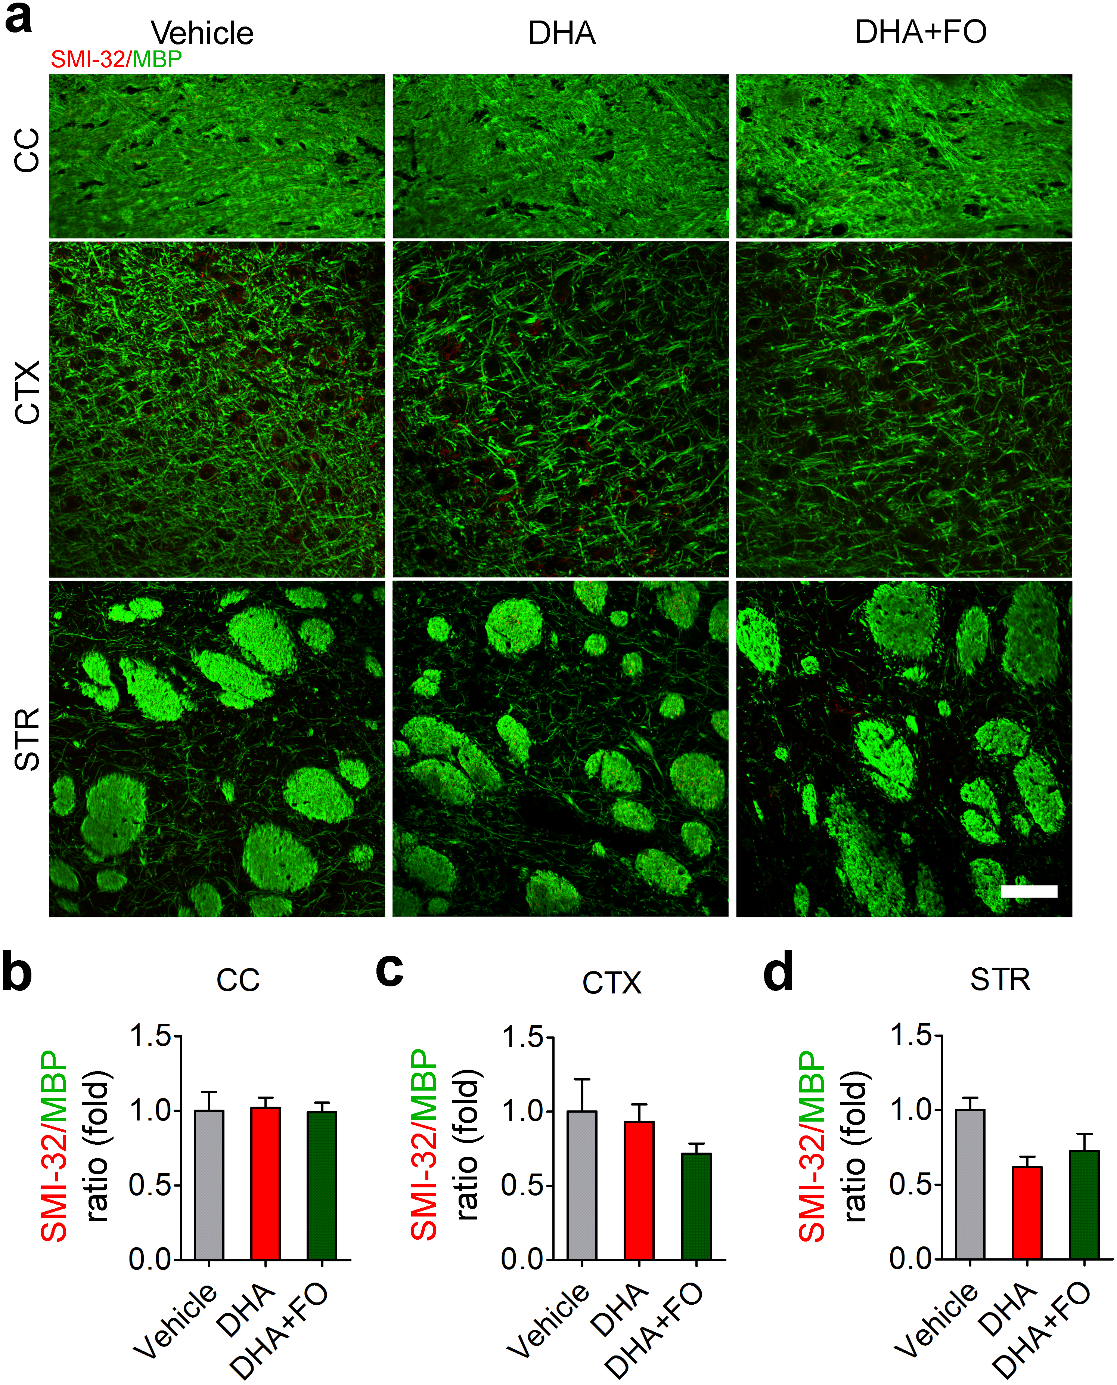
**

## Supplementary Fig. 1 Delayed DHA and FO treatments do not affect white matter integrity in the non-injured contralateral hemisphere after MCAO.

**a** Representative images of double-label immunostaining of MBP (*green*) and SMI-32 (*red*) in the corpus callosum (CC), cortex (CTX) and striatum (STR) of the non-injured contralateral hemisphere at 28 days after MCAO. There was abundant MBP expression but barely any SMI-32 immunosignal in all three regions. *Scale bar*: 50 μm. **b-d** Summarized ratio of SMI-32 to MBP fluorescence intensity in the CC, CTX and STR of the contralateral hemisphere. There was no statistical difference among all groups. n=5 mice per group.
